# Supplementary material
Source: PubMed Central journal article supplement (PMC4120239)
Supplement: NIHMS597760-supplement-1.pdf [file NIHMS597760-supplement-1.pdf]

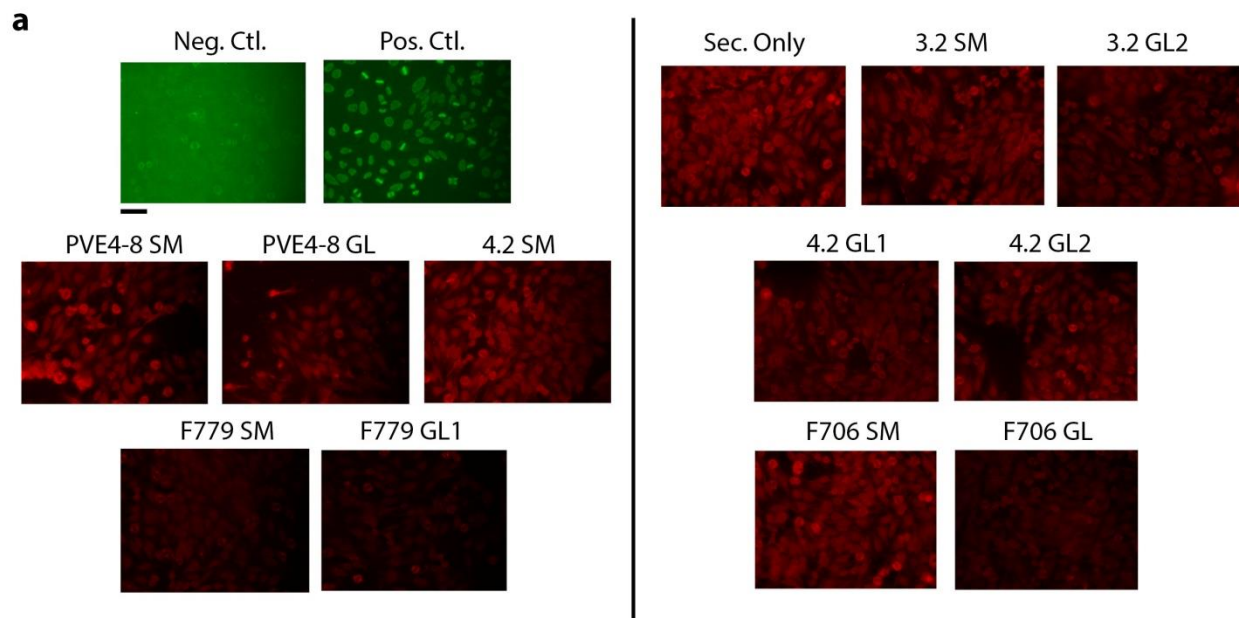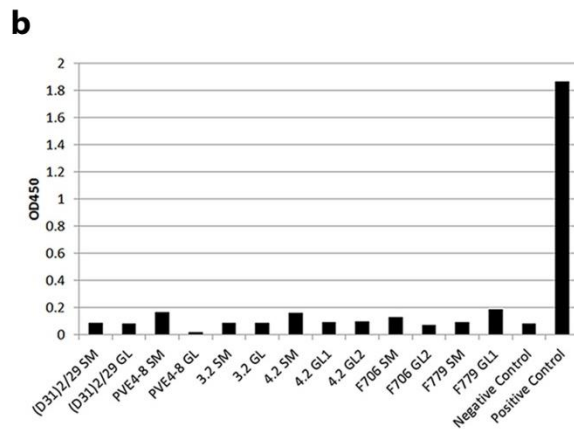

**Supplementary Figure 1. PV mAbs do not demonstrate Hep 2 polyreactivity.**

SM and GL mAbs were tested for reactivity to Hep 2 cells by immunofluorescence (**a**) and ELISA (**b**) at a concentration of 2-5 ug/mL. Negative (Neg.) and positive (Pos.) controls (Ctl.) from commercial kits are displayed and were developed with anti- human immunoglobulin conjugated antibodies. Sec. only indicates staining of cells with anti-hemagglutinin conjugated antibody only. Scale bar, 20  $\mu$ M. Data are representative of 1-2 experiments tested at multiple concentrations.

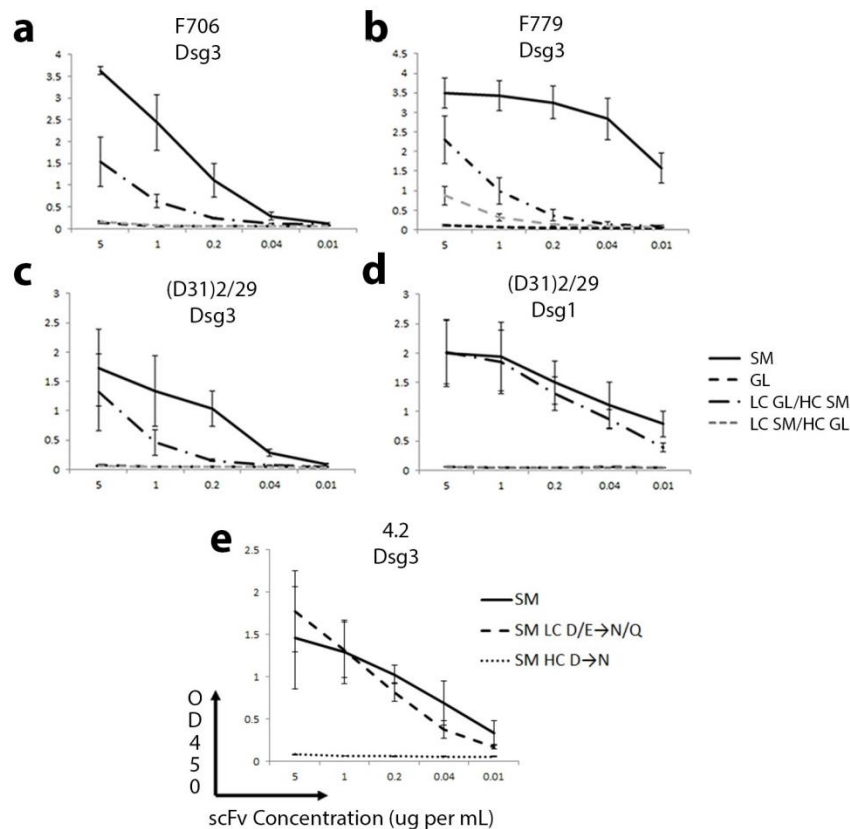

**Supplementary Figure 2.** Determinants of Dsg3 autoreactivity are predominantly encoded within the heavy chain. **(a)** F706 somatically mutated (SM) binds Dsg3 while F706 germline-reverted (GL) does not. Reversion of mutations in only the heavy chain (F706 LC SM/HC GL) does not bind Dsg3, whereas reversion of mutations in the light chain maintains Dsg3 autoreactivity (F706 LC GL/HC SM). **(b)** Reversion of somatic mutations in F779 indicates that the loss of mutations in the heavy chain affects relative binding affinity more than loss of mutations in the light chain. (D31)2/29, a previously characterized pathogenic scFv mAb, retains binding to **(c)** Dsg3 and **(d)** Dsg1 if mutations in the light chain, but not heavy chain, are reverted to their germline sequences. **(e)** Mutation of only acidic amino acid residues in the 4.2 HC CDRs (4.2 SM HC D→N) abolished Dsg3 binding by ELISA, whereas mutation of acidic amino acid residues in the LC CDRs did not significantly affect Dsg3 binding (4.2 SM LC D/E→N/Q). Errors bars indicate s.e.m. Data are representative of 3 experiments.

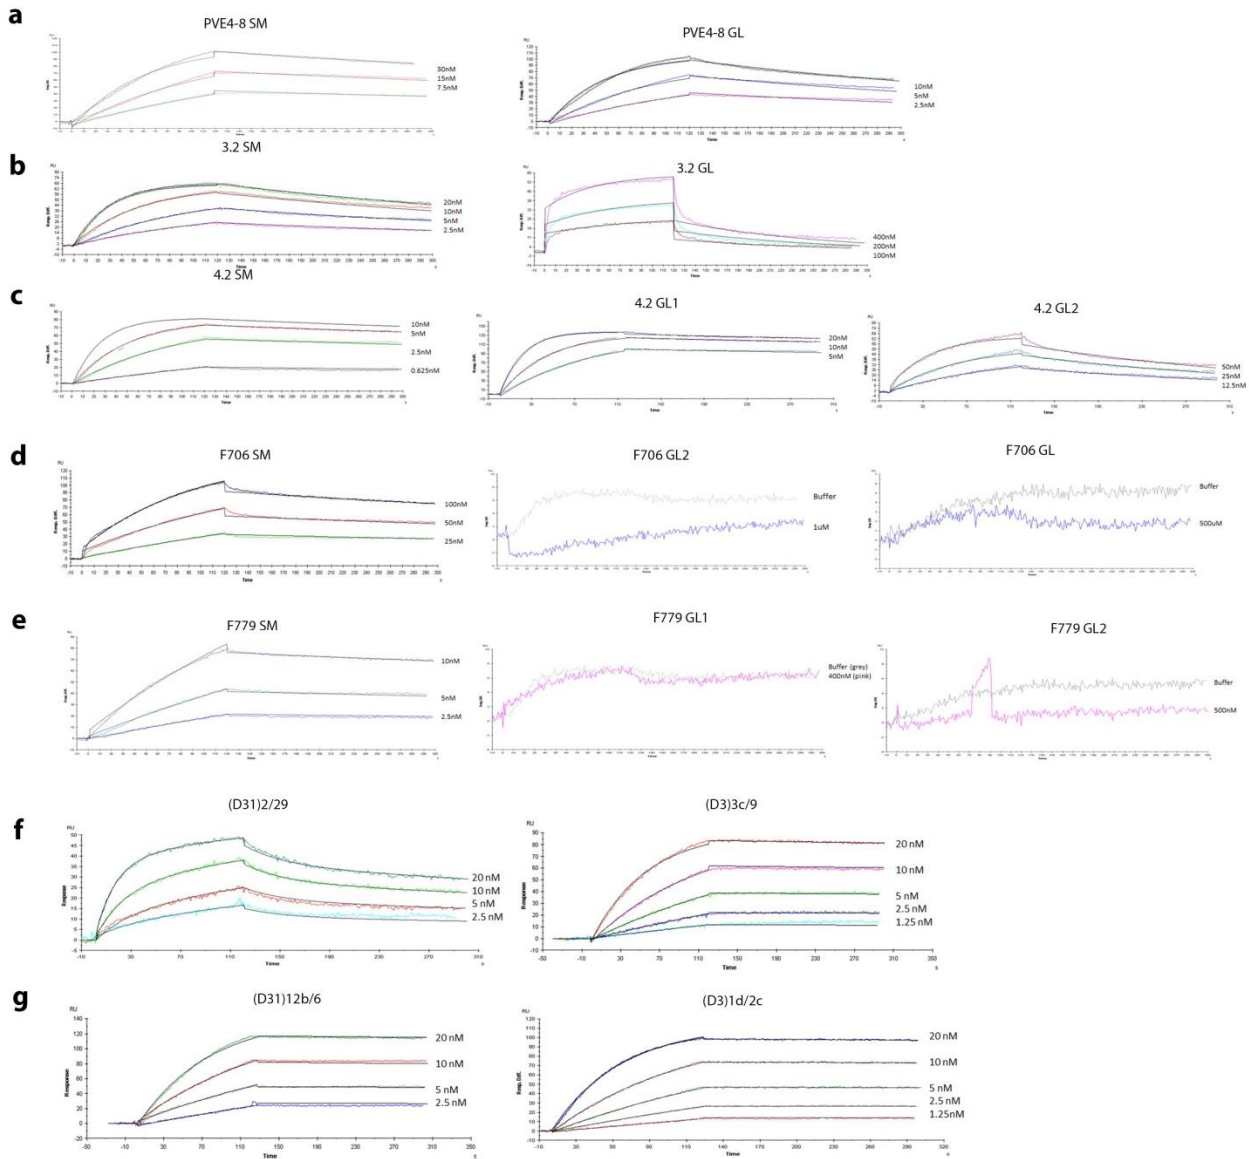

**Supplementary Figure 3.** Surface plasmon resonance curves for anti-Dsg3 mAbs (a-g). For most mAbs, the kinetic data conformed to a 1:1 Langmuir binding model. (D31)2/29 only fit a conformational change model. Some mAbs (such as 3.2GL) that have high chi-squared values or significant bulk change added to the fit may interact with Dsg3 in a more complex fashion than the 1:1 model shown (conformational change or heterogeneous ligand models did not improve the fit). Data are representative of 1-2 independent experiments, each testing multiple antibody concentrations.

|                     |                                                                                                                            |
|---------------------|----------------------------------------------------------------------------------------------------------------------------|
| human VH1-46*01/*03 | QVQLVQSGAEVKKPGASVKVSCKASGYTF <sup>TSYY</sup> MHWVRQAPGGLEWMIINPSGGSTSYAQKFGGRVTMTRDTSTSTVYME <sup>LSSLRSE</sup> DTAVYYCAR |
| murine VH1-53*01    | QVQLQQPGTELVKPGASVKLSCKASGYTF <sup>TSYWM</sup> MHWVKRPPGGLEWIGNINPSNGGTNYNEKFKSKATLTVDKSSSTAYMQLSSLTSEDSAVYYCAR            |
| AK23                | QVQLQQSGTELVKPGASVKLSCKSSGYTF <sup>TSYWI</sup> NWVKRPPGGLEWIGNINPSNGGINYNEKFKSKATLTVDKSSSTAYMQLKSLTSEDSAVYYCAR             |

\*
\*
\*\*
\*
\*

**Supplementary Figure 4.** VH1-46 is the closest human homolog of mouse VH1-53, used by the pathogenic mouse anti-Dsg3 mAb AK23. Homology between human VH1-46 and murine VH1-53 germline sequences and AK23 mAb sequence is shown; red=negatively charged, green=positively charged, blue=hydrophobic, black=hydrophilic. CDR1 sequence is boxed in blue; CDR2 sequence is boxed in green. Asterisks indicate replacement mutations occurring in AK23 relative to the VH1-53 germline sequence; only one replacement mutation is observed in the CDRs.

**Supplementary Table 1.** CDR sequences of anti-Dsg3 somatically mutated (SM), germline-reverted (GL), and point-mutated mAbs.

| c/clone                | CDR1 LC     | CDR2 LC | CDR3 LC     | VL gene        | JL gene  | CDR1 HC              | CDR2 HC   | CDR3 HC              | VH gene        | DH gene     | JH gene  |
|------------------------|-------------|---------|-------------|----------------|----------|----------------------|-----------|----------------------|----------------|-------------|----------|
| PVE4-8 SM              | SSDVGGYNY   | EVN     | SSYAGSNNLV  | IGLV2-8*01     | IGLJ2*01 | GYTFTAYY             | INPSGGIA  | ARDRQGFDDLV          | IGHV1-46*01    | IGHD3-22*01 | IGHJ6*02 |
| PVE4-8 GL              | SSDVGGYNY   | EVS     | SSYAGSNNLV  |                |          | GYTFTSYY             | INPSGGST  | ARDRQGFDDLV          |                |             |          |
| PVE4-8 GL HC D→N       | SSDVGGYNY   | EVS     | SSYAGSNNLV  |                |          | GYTFTSYY             | INPSGGST  | ARNRQGFNLLV          |                |             |          |
| 3.2 SM                 | SSDIGRYNF   | EIY     | SSYVGNNDLV  |                |          | GYTFTSYY             | INPSGGIA  | ARDLGGDFDY           |                |             |          |
| 3.2 GL                 | SSDVGGYNY   | EVS     | SSYVGNNDLV  | IGLV2-8*01     | IGLJ7*01 | GYTFTSYY             | INPSGGST  | ARDLGGDFDY           | IGHV1-46*01    | IGHD5-12*01 | IGHJ4*02 |
| 4.2 SM                 | SSDVGGYNY   | EVS     | SSYAGSNNWV  | IGLV2-14*01    | IGLJ3*02 | GYIFTSHY             | INPSGGKT  | ARDQSLGMDV           | IGHV1-46*01    | IGHD6-25*01 | IGHJ6*02 |
| 4.2 GL1                | SSDVGGYNY   | EVS     | SSYTSSNNWV  |                |          | GYIFTSYY             | INPSGGST  | ARDQRLGMDV           |                |             |          |
| 4.2 GL1 HC D→N         | SSDVGGYNY   | EVS     | SSYTSSNNWV  |                |          | GYIFTSYY             | INPSGGST  | ARNQR LGMNV          |                |             |          |
| 4.2 GL2                | SSDVGGYNY   | EVS     | SSYTSSNNWV  | IGLV2-14*01    | IGLJ3*02 | GYIFTSYY             | INPSGGST  | ARDHSLGMDV           | IGHV1-46*01    | IGHD3-22*01 | IGHJ6*02 |
| 4.2 GL2 HC D→N         | SSDVGGYNY   | EVS     | SSYTSSNNWV  |                |          | GYIFTSYY             | INPSGGST  | ARNHSLGMNV           |                |             |          |
| 4.2 SM LC D/E - N/Q    | SSNVGGYNY   | QVS     | SSYAGSNNWV  |                |          | GYIFTSHY             | INPSGGKT  | ARDQSLGMDV           |                |             |          |
| 4.2 SM HC D - Q        | SSDVGGYNY   | EVS     | SSYAGSNNWV  |                |          | GYIFTSHY             | INPSGGKT  | ARNQSLGMNV           |                |             |          |
| F706 SM                | ETLVHSDGNTY | KIS     | TQSTDFPWT   | IGKV2-24*01    | IGLJ1*01 | GYTFTSYY             | IDSRGGST  | ARGVGLDH             | IGHV1-46*01    | IGHD2-21*02 | IGHJ4*02 |
| F706 GL2               | QSLVHSDGNTY | KIS     | TQSTDFPWT   |                |          | GYTFTSYY             | INPSGGST  | ARGVGLDH             |                |             |          |
| F706 GL2 + D/E         | ESLVHSDGNTY | KIS     | TQSTDFPWT   |                |          | GYTFTSYY             | IDPSGGST  | ARGVGLDH             |                |             |          |
| F706 GL                | QSLVHSDGNTY | KIS     | MQATQFPWT   |                |          | GYTFTSYY             | INPSGGST  | ARVVVTLDY            |                |             |          |
| F779 SM                | ETLVHSDGNTY | KIS     | MQATEFPYT   | IGKV2-24*01    | IGLJ2*01 | GNTFTTYS             | IDPSGGST  | ARSIESISGRTLGY       | IGHV1-46*01    | IGHD6-19*01 | IGHJ4*02 |
| F779 GL1               | QSLVHSDGNTY | KIS     | MQATEFPYT   |                |          | GYTFTSYY             | INPSGGST  | ARSIESISGRTLGY       |                |             |          |
| F779 GL1 + D/E         | ESLVHSDGNTY | KIS     | MQATEFPYT   |                |          | GYTFTSYY             | IDPSGGST  | ARSIESISGRTLGY       |                |             |          |
| F779 SM D/E - N/Q      | QTLVHSDGNTY | KIS     | MQATEFPYT   |                |          | GNTFTTYS             | INPSGGST  | ARSIESISGRTLGY       |                |             |          |
| F779 GL2               | QSLVHSDGNTY | KIS     | MQATQFPYT   |                |          | GYTFTSYY             | INPSGGST  | ARSIEYSSGwTLGY       |                |             |          |
| F779 GL2 + D/E         | ESLVHSDGNTY | KIS     | MQATEFPYT   |                |          | GYTFTSYY             | IDPSGGST  | ARSIEYSSGwTLGY       |                |             |          |
| (D3)1d/2c SM           | SSNIAGNT    | YND     | ATWDEDVNGWV | IGLV1-44*01    | IGLJ3*02 | GGTFDKYA             | IIPMLGAP  | ARDKAAYYESGYYYIGDF   | IGHV1-69*06    | IGHD3-22*01 | IGHJ4*02 |
| (D3)1d/2c GL           | SSNIGSNT    | SNN     | AAWDDSLNGWV |                |          | GGTFSSYA             | IIPILGTA  | ARDKAAYYESGYYYFDY    |                |             |          |
| (D31)2/29 SM           | KLGDY       | QDR     | QAWDSSTAV   |                |          | GGTFGNYA             | IIPITLDDL | ARGGDYSGwYNFYD       |                |             |          |
| (D31)2/29 GL           | KLGDY       | QDS     | QAWDSSTAV   | IGLV3-1*01     | IGLJ3*02 | GGTFSSYA             | IIPILGIA  | ARGGDYSGwYNFYD       | IGHV1-69*06/09 | IGHD6-19*01 | IGHJ4*02 |
| (D3)3c/9 SM            | SSYVGFNLL   | EGD     | YSYVAGSDLVW | IGLV2-23*01/03 | IGLJ3*02 | GLPFNSYW             | INQDQNEK  | ASGGVVDVDH           | IGHV3-07*03    | IGHD2-15*01 | IGHJ4*02 |
| (D3)3c/9 GL            | SSDVGSYNL   | EGS     | CSYAGSSTLWV |                |          | GTFSSYW              | IKQDQSEK  | ARDGVDYFDY           |                |             |          |
| (D31)12b/6 SM          | SSHIGSNY    | SND     | AAWDDGQGGV  |                |          | GGSISSNW             | IYHNGST   | ARGwHRTGFRGYPSHwYFDL | IGHV4-04*02    | IGHD5-12*01 | IGHJ2*01 |
| (D31)12b/6 LC SM/HC GL | SSHIGSNY    | SND     | AAWDDGQGGV  | GGSISSNW       | IYHNGST  | AREwHRTGYSGYPSYwYFDL |           |                      |                |             |          |
| VH5a SM                | SSNIRNNY    | DDN     | GTWDSQSQSGV | IGLV1-51*01    | IGLJ3*02 | GNPNSNYW             | IDPFDGYT  | ARINYYDGS GHSDADYM   |                |             |          |
| VH5a LC GL/HC SM       | SSNIGNNY    | DNN     | GTWDSLSAGV  |                |          | GNPNSNYW             | IDPFDGYT  | ARINYYDGS GHSDADYM   |                |             |          |
| VH5a LC SM/HC GL       | SSNIRNNY    | DDN     | GTWDSQSQSGV |                |          | GYSFTSYW             | IDPDSYD   | ARINYYDSSGYSDAFDI    | IGHV5a*01      | IGHD3-22*01 | IGHJ3*02 |

**Supplementary Table 2.** 3.2 epitope specificity for EC1 and EC3 is predominantly determined by the heavy chain. Epitope mapping of a second mAb that utilizes the identical heavy chain as 3.2, but paired with a different light chain. Data are representative of 2 independent experiments.

|          | <b>CDR1</b> | <b>CDR2</b> | <b>CDR3</b> | <b>V gene</b> | <b>J gene</b> | <b>EC1</b> | <b>EC2</b> | <b>EC3</b> | <b>EC4</b> | <b>EC5</b> |
|----------|-------------|-------------|-------------|---------------|---------------|------------|------------|------------|------------|------------|
| 3.2 LC 1 | SSDIGRYNF   | EIY         | SSYVGNNDLV  | IGLV2-8*01    | IGLJ7*01      | X          |            | X          |            |            |
| 3.2 LC 2 | SSDVGRYDL   | EVT         | CSYAGRYTLL  | IGLV2-23*01   | IGLJ3*01      | X          |            | X          |            |            |



**Supplementary Table 3.** BASELINE test of significance for antigen-driven selection. Negative and positive selection are indicated by – and + symbols before the p values. BASELINE sigma value is a measure of the strength of negative or positive selection and allows comparison of selection strength between different Abs. VH1-46 mAbs do not show statistically significant evidence of positive antigen-driven selection in the CDRs, although two VH1-46 mAbs demonstrate significant evidence of negative selection against replacement mutations in the FWRs ( $p < 0.05$ , highlighted in dark gray). Multiple other clonal lineages also demonstrate statistically significant evidence of negative selection against replacement mutations in the FWRs. VH1-69 clonal lineage 1 demonstrates statistically significant evidence of positive antigen-driven selection in the CDRs. Increasing sigma values within the VH1-69 clonal lineage 2 CDRs, with a trend toward significance ( $0.05 < p < 0.1$ , highlighted in light gray), suggest the presence of increasing antigen-driven positive selection pressure on these clones. Statistical significance is determined by a binomial test.

| ID                                     | Observed Mutations |   |     |   | Total Mutations | Expected Mutation Frequencies |       |       |       | Expected Mutations |       |        |       | BASELINE Selection Analysis |         |        |          |
|----------------------------------------|--------------------|---|-----|---|-----------------|-------------------------------|-------|-------|-------|--------------------|-------|--------|-------|-----------------------------|---------|--------|----------|
|                                        | CDR                |   | FWR |   |                 | CDR                           |       | FWR   |       | CDR                |       | FWR    |       | CDR                         |         | FWR    |          |
|                                        | R                  | S | R   | S |                 | R                             | S     | R     | S     | R                  | S     | R      | S     | Σ                           | P-Value | Σ      | P-Value  |
| <b>IGHV1-46*01 Clonal Lineage 1</b>    |                    |   |     |   |                 |                               |       |       |       |                    |       |        |       |                             |         |        |          |
| 3.2                                    | 2                  | 4 | 4   | 1 | 11              | 0.183                         | 0.056 | 0.579 | 0.182 | 2.013              | 0.616 | 6.369  | 2.002 | -0.57                       | -0.234  | -1.1   | -0.0429  |
| <b>IGHV1-46*01 Clonal Lineage 2</b>    |                    |   |     |   |                 |                               |       |       |       |                    |       |        |       |                             |         |        |          |
| 4.2                                    | 4                  | 2 | 9   | 1 | 16              | 0.183                         | 0.056 | 0.579 | 0.182 | 2.928              | 0.896 | 9.264  | 2.912 | 0.524                       | 0.233   | 0.129  | 0.435    |
| <b>IGHV1-46*01/03 Clonal Lineage 3</b> |                    |   |     |   |                 |                               |       |       |       |                    |       |        |       |                             |         |        |          |
| F706                                   | 5                  | 2 | 5   | 8 | 20              | 0.172                         | 0.053 | 0.584 | 0.191 | 3.44               | 1.06  | 11.68  | 3.82  | -0.307                      | -0.284  | -1.53  | -0.00132 |
| <b>IGHV1-46*01/03 Clonal Lineage 4</b> |                    |   |     |   |                 |                               |       |       |       |                    |       |        |       |                             |         |        |          |
| F779                                   | 4                  | 0 | 7   | 5 | 16              | 0.172                         | 0.053 | 0.584 | 0.191 | 2.752              | 0.848 | 9.344  | 3.056 | 0.14                        | 0.408   | -0.56  | -0.158   |
| <b>IGHV1-46*01 Clonal Lineage 5</b>    |                    |   |     |   |                 |                               |       |       |       |                    |       |        |       |                             |         |        |          |
| PVE4-8                                 | 4                  | 2 | 6   | 3 | 15              | 0.183                         | 0.056 | 0.579 | 0.182 | 2.745              | 0.84  | 8.685  | 2.73  | 0.0538                      | 0.462   | -0.719 | -0.108   |
| <b>IGHV1-69*06 Clonal Lineage 1</b>    |                    |   |     |   |                 |                               |       |       |       |                    |       |        |       |                             |         |        |          |
| (D31)2/29                              | 10                 | 1 | 8   | 4 | 23              | 0.178                         | 0.059 | 0.564 | 0.2   | 4.094              | 1.357 | 12.972 | 4.6   | 1.03                        | 0.0224  | -0.338 | -0.263   |
| <b>IGHV1-69*06 Clonal Lineage 2</b>    |                    |   |     |   |                 |                               |       |       |       |                    |       |        |       |                             |         |        |          |
| (D3)1i/4d                              | 9                  | 1 | 9   | 7 | 26              | 0.178                         | 0.059 | 0.564 | 0.2   | 4.628              | 1.534 | 14.664 | 5.2   | 0.485                       | 0.151   | -0.668 | -0.0793  |
| (D3)1d/2c                              | 8                  | 1 | 9   | 4 | 22              | 0.178                         | 0.059 | 0.564 | 0.2   | 3.916              | 1.298 | 12.408 | 4.4   | 0.814                       | 0.0659  | -0.226 | -0.328   |
| (D3)1g/2e                              | 9                  | 1 | 8   | 7 | 25              | 0.178                         | 0.059 | 0.564 | 0.2   | 4.45               | 1.475 | 14.1   | 5     | 0.485                       | 0.151   | -0.78  | -0.0545  |
| (D3)1b/3a                              | 8                  | 1 | 8   | 5 | 22              | 0.178                         | 0.059 | 0.564 | 0.2   | 3.916              | 1.298 | 12.408 | 4.4   | 0.644                       | 0.107   | -0.508 | -0.164   |
| (D3)1c/2a                              | 9                  | 1 | 8   | 5 | 23              | 0.178                         | 0.059 | 0.564 | 0.2   | 4.094              | 1.357 | 12.972 | 4.6   | 0.756                       | 0.0666  | -0.508 | -0.164   |
| (D3)1h/2b                              | 8                  | 1 | 9   | 4 | 22              | 0.178                         | 0.059 | 0.564 | 0.2   | 3.916              | 1.298 | 12.408 | 4.4   | 0.814                       | 0.0659  | -0.226 | -0.328   |
| (D3)1f/4c                              | 8                  | 1 | 8   | 6 | 23              | 0.178                         | 0.059 | 0.564 | 0.2   | 4.094              | 1.357 | 12.972 | 4.6   | 0.499                       | 0.159   | -0.653 | -0.0965  |
| (D3)1e/2d                              | 8                  | 1 | 6   | 6 | 21              | 0.178                         | 0.059 | 0.564 | 0.2   | 3.738              | 1.239 | 11.844 | 4.2   | 0.499                       | 0.159   | -0.925 | -0.0423  |
| (D3)1a/4a                              | 9                  | 1 | 8   | 5 | 23              | 0.178                         | 0.059 | 0.564 | 0.2   | 4.094              | 1.357 | 12.972 | 4.6   | 0.756                       | 0.0666  | -0.508 | -0.164   |
| <b>IGHV3-7*03 Clonal Lineage</b>       |                    |   |     |   |                 |                               |       |       |       |                    |       |        |       |                             |         |        |          |
| (D3)3c/9                               | 5                  | 2 | 8   | 7 | 22              | 0.213                         | 0.051 | 0.55  | 0.186 | 4.686              | 1.122 | 12.1   | 4.092 | -0.45                       | -0.201  | -0.955 | -0.0219  |
| (D3)3a/9                               | 5                  | 2 | 7   | 6 | 20              | 0.213                         | 0.051 | 0.55  | 0.186 | 4.26               | 1.02  | 11     | 3.72  | -0.338                      | -0.271  | -0.969 | -0.0268  |
| (D3)3b/8                               | 5                  | 2 | 6   | 5 | 18              | 0.213                         | 0.051 | 0.55  | 0.186 | 3.834              | 0.918 | 9.9    | 3.348 | -0.212                      | -0.356  | -0.988 | -0.0329  |
| <b>IGHV4-4*02 Clonal Lineage</b>       |                    |   |     |   |                 |                               |       |       |       |                    |       |        |       |                             |         |        |          |
| (D31)12b/6                             | 3                  | 1 | 9   | 4 | 17              | 0.235                         | 0.042 | 0.52  | 0.203 | 3.995              | 0.714 | 8.84   | 3.451 | -0.431                      | -0.268  | -0.201 | -0.345   |
| (D31)12a/5                             | 5                  | 0 | 11  | 4 | 20              | 0.235                         | 0.042 | 0.52  | 0.203 | 4.7                | 0.84  | 10.4   | 4.06  | 0.246                       | 0.352   | 0.195  | 0.375    |
| (D31)12c/7                             | 5                  | 0 | 9   | 3 | 17              | 0.235                         | 0.042 | 0.52  | 0.203 | 3.995              | 0.714 | 8.84   | 3.451 | 0.509                       | 0.231   | 0.264  | 0.349    |
| <b>IGHV5-a*01 Clonal Lineage</b>       |                    |   |     |   |                 |                               |       |       |       |                    |       |        |       |                             |         |        |          |
| VH5a                                   | 9                  | 1 | 18  | 9 | 37              | 0.197                         | 0.058 | 0.592 | 0.154 | 7.289              | 2.146 | 21.904 | 5.698 | -0.0308                     | -0.474  | -0.463 | -0.116   |
| <b>IGHV3-30*04 Clonal Lineage</b>      |                    |   |     |   |                 |                               |       |       |       |                    |       |        |       |                             |         |        |          |
| (D3)4/30                               | 2                  | 0 | 2   | 4 | 8               | 0.227                         | 0.05  | 0.534 | 0.188 | 1.816              | 0.4   | 4.272  | 1.504 | -0.578                      | -0.239  | -1.43  | -0.0934  |

**Supplementary Table 4.** VH1-46 single nucleotide variants (SNVs). 35 previously reported VH1-46 SNVs (<http://www.ncbi.nlm.nih.gov/variation/tools/1000genomes>) are shown, along with observed minor allele frequency, the majority codon sequence (observed in the ancestral VH1-46 allele \*01), the variant sequence, and whether the nucleotide variant is silent or non-silent in regard to the amino acid sequence. CDR1 residues are boxed in blue; CDR2 residues are boxed in green. None of the CDR1-2 SNVs were identified in our 4 PV patients, suggesting that VH1-46 polymorphisms likely did not contribute to PV susceptibility in these patients.

| <i>SNV reference</i> | <i>minor allele frequency</i> | <i>majority codon</i> | <i>variant</i> | <i>silent</i> | <i>non-silent</i> | <i>AA change</i> |
|----------------------|-------------------------------|-----------------------|----------------|---------------|-------------------|------------------|
| <i>rs374571144</i>   | -                             | <i>GTG</i>            | <i>GTT</i>     | x             |                   |                  |
| <i>rs370958214</i>   | -                             | <i>CAG</i>            | <i>CAA</i>     | x             |                   |                  |
| <i>rs184383009</i>   | 0.001                         | <i>CTG</i>            | <i>TTG</i>     | x             |                   |                  |
| <i>rs191958250</i>   | -                             | <i>GTG</i>            | <i>ATG</i>     |               | x                 | V->M             |
| <i>rs375773401</i>   | -                             | <i>GGG</i>            | <i>GCG</i>     |               | x                 | G->A             |
| <i>rs61732934</i>    | -                             | <i>GCT</i>            | <i>GGT/GTT</i> |               | x                 | A->G/A->V        |
| <i>rs188566927</i>   | 0.001                         | <i>AAG</i>            | <i>CAG</i>     |               | x                 | K->Q             |
| <i>rs370633142</i>   | -                             | <i>AAG</i>            | <i>AAC</i>     |               | x                 | K->N             |
| <i>rs377180003</i>   | -                             | <i>GGG</i>            | <i>GGA</i>     | x             |                   |                  |
| <i>rs372749973</i>   | -                             | <i>GCC</i>            | <i>ACC</i>     |               | x                 | A->T             |
| <i>rs61747196</i>    | 0.002                         | <i>GTT</i>            | <i>ATT</i>     |               | x                 | V->I             |
| <i>rs61995748</i>    | 0.002                         | <i>AAG</i>            | <i>ATG</i>     |               | x                 | K->M             |
| <i>rs192285778</i>   | -                             | <i>GCA</i>            | <i>TCA</i>     |               | x                 | A->S             |
| <i>rs187613260</i>   | 0.0005                        | <i>TAC</i>            | <i>GAC</i>     |               | x                 | Y->D             |
| <i>rs377014204</i>   | -                             | <i>TAC</i>            | <i>TAT</i>     | x             |                   |                  |
| <i>rs374579537</i>   | -                             | <i>AGC</i>            | <i>AGG</i>     |               | x                 | S->R             |
| <i>rs182132309</i>   | 0.001                         | <i>TAC</i>            | <i>ATC</i>     |               | x                 | Y->I             |
| <i>rs369870124</i>   | -                             | <i>TAT</i>            | <i>TTT</i>     |               | x                 | Y->F             |
| <i>rs376685264</i>   | -                             | <i>ATG</i>            | <i>GTG</i>     |               | x                 | M->V             |
| <i>rs144704015</i>   | 0.002                         | <i>ATG</i>            | <i>ATA</i>     |               | x                 | M->I             |
| <i>rs367562305</i>   | -                             | <i>CCT</i>            | <i>TCT</i>     |               | x                 | P->S             |
| <i>rs376171941</i>   | -                             | <i>GAG</i>            | <i>GAA</i>     | x             |                   |                  |
| <i>rs371609422</i>   | -                             | <i>CCT</i>            | <i>CTT</i>     |               | x                 | P->L             |
| <i>rs190309173</i>   | -                             | <i>GGT</i>            | <i>AGT</i>     |               | x                 | G->S             |
| <i>rs185595166</i>   | 0.002                         | <i>AGC</i>            | <i>ACC</i>     |               | x                 | S->T             |
| <i>rs181189514</i>   | -                             | <i>ACA</i>            | <i>GCA</i>     |               | x                 | T->G             |
| <i>rs368402773</i>   | -                             | <i>TAC</i>            | <i>AAC</i>     |               | x                 | Y->N             |
| <i>rs149338091</i>   | 0.001                         | <i>AAG</i>            | <i>AGG</i>     |               | x                 | K->R             |
| <i>rs55801711</i>    | 0.008                         | <i>TTC</i>            | <i>TTG</i>     |               | x                 | F->L             |
| <i>rs371133633</i>   | -                             | <i>GGC</i>            | <i>GAC</i>     |               | x                 | G->D             |
| <i>rs368616898</i>   | -                             | <i>ACC</i>            | <i>ATC</i>     |               | x                 | T->I             |
| <i>rs147211698</i>   | 0.003                         | <i>ACG</i>            | <i>ATG</i>     |               | x                 | T->M             |
| <i>rs370428883</i>   | -                             | <i>ACG</i>            | <i>ACA</i>     | x             |                   |                  |
| <i>rs376062317</i>   | -                             | <i>GTG</i>            | <i>ATG</i>     |               | x                 | V->M             |
| <i>rs11848941</i>    | 0.156                         | <i>GCG</i>            | <i>GCA/GCT</i> | x             |                   |                  |



## Supplementary Methods

### 3' Light Chain scFv Long Linker Primer Sequences

3.2

5'-  
CTCTCTAGAGGAACCACCGCCGAGGACGGTCAGCTGGGTGCCTCCGCCAAAGACCAAATCGT  
TGTTGCCACATAGGAACTGCAGTAATAATCAGCCTCATC

4.2

5'-  
CTCTCTAGAGGAACCACCTAGGACGGTCAGCTTGGTCCCTCCGCCGAACACCCAATTGTT  
GCTGCCTGCATATGAGCTGCAGTAATAATCAGCCTC

PVE4-8

5'-  
CTCTCTAGAGGAACCACCTAGGACGGTCACCTTGGTGCCTCCGCCGAATACGAGATTGTT  
GCTGCCTGCATATGAGCTGCAGTAATAATCAGCCTC

F706

5'-  
CTCTCTAGAGGAACCACCGCCTTTGATTTCCACCTTGGTCCCTTGGCCGAACGTCCAAGGGAA  
ATCTGTAGATTGCGTGCAGTAATAAACCCCGACATC

F779

5'-  
CTCTCTAGAGGAACCACCGCCTTTGATCTCCAGCTTGGTCCCTGGCCAAAAGTGTACGGAAA  
TTCTGTAGCTTGCATGCAGTAATAAACCCCGACATC

(D31)2/29

CTCTCTAGAGGAACCACCGCCTAGGACGGTCACCTTGGTCCCTCCGCCGAACACCGCAGTGCT  
GCTGTCCCACGCCTGACAGTAATAGTCAGCCTCATC
